# Supplementary material
Source: Springer Nature journal article supplement (https://www.springermedizin.de/resource/supplementary/13012_2010_306_MOESM2_ESM.pdf/9629682)
Supplement: MOESM2 [file 9629682]

How bad is it?

GMFCS

Classifies gross motor function of children with CP

Will our child walk?

Motor Growth Curves

Relates prognosis to age and GMFCS level

How do we know therapy is working?

GMFM -88 & GMFM -66

Measures change over time due to therapy and/or development
